# Supplementary material for: Effects of economic downturns on child mortality: a global economic analysis, 1981–2010
Source: PubMed Central journal article supplement — BMJ Glob Health. 2017 Apr 18;2(2):e000157. doi: 10.1136/bmjgh-2016-000157 (PMC5435251; doi:10.1136/bmjgh-2016-000157), 2017-04-18
Supplement: bmjgh-2016-000157supp_appendix.pdf [file bmjgh-2016-000157supp_appendix.pdf]

**APPENDIX**

**TABLE A: All countries used in the study, quartiled by average GDP/capita from 1981-2011.**

| <b>Quartile 4:<br/>Lowest GDP per capita</b> | <b>Quartile 3:<br/>second lowest GDP per capita</b> | <b>Quartile 2:<br/>second highest GDP per capita</b> | <b>Quartile 1:<br/>highest GDP per capita</b> | <b>Unclassified (GDP per capita data unavailable)</b> |
|----------------------------------------------|-----------------------------------------------------|------------------------------------------------------|-----------------------------------------------|-------------------------------------------------------|
| Angola                                       | Albania                                             | Antigua and Barbuda                                  | Andorra                                       | Afghanistan                                           |
| Bangladesh                                   | Algeria                                             | Argentina                                            | Aruba                                         | Cayman Islands                                        |
| Benin                                        | Armenia                                             | Barbados                                             | Australia                                     | Myanmar                                               |
| Burkina Faso                                 | Azerbaijan                                          | Belize                                               | Austria                                       | South Sudan                                           |
| Burundi                                      | Belarus                                             | Botswana                                             | Bahamas, The                                  | Virgin Islands (U.S.)                                 |
| Cambodia                                     | Bhutan                                              | Brazil                                               | Bahrain                                       |                                                       |
| Central African Republic                     | Bolivia                                             | Chile                                                | Belgium                                       |                                                       |
| Chad                                         | Bosnia and Herzegovina                              | Colombia                                             | Bermuda                                       |                                                       |
| Comoros                                      | Bulgaria                                            | Costa Rica                                           | Brunei Darussalam                             |                                                       |
| Congo, Dem. Rep.                             | Cape Verde                                          | Croatia                                              | Canada                                        |                                                       |
| Cote d'Ivoire                                | China                                               | Cuba                                                 | Channel Islands                               |                                                       |
| Ethiopia                                     | Congo, Rep.                                         | Czech Republic                                       | Cyprus                                        |                                                       |
| Eritrea                                      | Djibouti                                            | Dominica                                             | Denmark                                       |                                                       |
| Gambia, The                                  | Ecuador                                             | Dominican Republic                                   | Faeroe Islands                                |                                                       |
| Ghana                                        | Egypt, Arab Rep.                                    | Equatorial Guinea                                    | Finland                                       |                                                       |
| Guinea                                       | El Salvador                                         | Estonia                                              | France                                        |                                                       |
| Guinea-Bissau                                | Fiji                                                | Gabon                                                | French Polynesia                              |                                                       |
| Haiti                                        | Georgia                                             | Grenada                                              | Germany                                       |                                                       |
| India                                        | Guatemala                                           | Hungary                                              | Greece                                        |                                                       |
| Kenya                                        | Guyana                                              | Jamaica                                              | Greenland                                     |                                                       |
| Kyrgyz Republic                              | Honduras                                            | Latvia                                               | Hong Kong SAR, China                          |                                                       |
| Lao PDR                                      | Indonesia                                           | Lebanon                                              | Iceland                                       |                                                       |
| Lesotho                                      | Iran, Islamic Rep.                                  | Libya                                                | Ireland                                       |                                                       |
| Liberia                                      | Iraq                                                | Lithuania                                            | Isle of Man                                   |                                                       |
| Madagascar                                   | Jordan                                              | Malaysia                                             | Israel                                        |                                                       |
| Malawi                                       | Kazakhstan                                          | Maldives                                             | Italy                                         |                                                       |
| Mali                                         | Kiribati                                            | Malta                                                | Japan                                         |                                                       |
| Mauritania                                   | Kosovo                                              | Marshall Islands                                     | Korea, Rep.                                   |                                                       |
| Moldova                                      | Macedonia, FYR                                      | Mauritius                                            | Kuwait                                        |                                                       |
| Mongolia                                     | Montenegro                                          | Mexico                                               | Liechtenstein                                 |                                                       |
| Mozambique                                   | Morocco                                             | Micronesia, Fed. Sts.                                | Luxembourg                                    |                                                       |

|                       |                      |                                |                      |  |
|-----------------------|----------------------|--------------------------------|----------------------|--|
| Nepal                 | Nicaragua            | Namibia                        | Macao SAR, China     |  |
| Niger                 | Papua New Guinea     | Oman                           | Monaco               |  |
| Nigeria               | Paraguay             | Palau                          | Netherlands          |  |
| Pakistan              | Philippines          | Panama                         | New Caledonia        |  |
| Rwanda                | Romania              | Peru                           | New Zealand          |  |
| Sao Tome and Principe | Samoa                | Poland                         | Norway               |  |
| Senegal               | Serbia               | Russian Federation             | Portugal             |  |
| Sierra Leone          | Solomon Islands      | Seychelles                     | Puerto Rico          |  |
| Sudan                 | Sri Lanka            | Slovak Republic                | Qatar                |  |
| Tajikistan            | Swaziland            | South Africa                   | San Marino           |  |
| Tanzania              | Syrian Arab Republic | St. Kitts and Nevis            | Saudi Arabia         |  |
| Timor-Leste           | Thailand             | St. Lucia                      | Singapore            |  |
| Togo                  | Tonga                | St. Vincent and the Grenadines | Slovenia             |  |
| Uganda                | Turkmenistan         | Suriname                       | Spain                |  |
| Uzbekistan            | Tuvalu               | Trinidad and Tobago            | Sweden               |  |
| Vietnam               | Ukraine              | Tunisia                        | Switzerland          |  |
| Yemen, Rep.           | Vanuatu              | Turkey                         | United Arab Emirates |  |
| Zambia                | West Bank and Gaza   | Uruguay                        | United Kingdom       |  |
| Zimbabwe              | West Bank and Gaza   | Venezuela, RB                  | United States        |  |

**TABLE B: Changes in health outcomes 0-5 years after economic downturns end**

The impact of economic downturns on four child-health metrics, 0-5 years after the downturn ends. We control for downturns in the intervening years; for example, when looking at 4 years after a downturn, we control for possible downturns 3, 2, and 1 years after the downturn in question. We control for population size, population structure (proportion of population below 15 years of age, proportion of population above 65 years of age) and for inter-country differences in healthcare infrastructure in addition to political, cultural and structural differences (by introducing dummy variables for all of the countries in the dataset).

| Years after downturn | Neonatal mortality |           | Post-neonatal mortality |           | One-to-five (child) mortality |           | Under-five mortality |           |
|----------------------|--------------------|-----------|-------------------------|-----------|-------------------------------|-----------|----------------------|-----------|
|                      | Coefficient        | P-value   | Coefficient             | P-value   | Coefficient                   | P-value   | Coefficient          | P-value   |
| 5                    | 0.6821             | 0.0000*** | 1.1418                  | 0.0000*** | 1.6300                        | 0.0000*** | 3.1260               | 0.0000*** |
| 4                    | 0.7163             | 0.0000*** | 1.2123                  | 0.0000*** | 1.7950                        | 0.0000*** | 3.3541               | 0.0000*** |
| 3                    | 0.7415             | 0.0000*** | 1.2687                  | 0.0000*** | 1.8393                        | 0.0000*** | 3.4712               | 0.0000*** |
| 2                    | 0.8116             | 0.0000*** | 1.3979                  | 0.0000*** | 2.0194                        | 0.0000*** | 3.8172               | 0.0000*** |
| 1                    | 0.8010             | 0.0000*** | 1.3984                  | 0.0000*** | 1.9733                        | 0.0000*** | 3.7673               | 0.0000*** |
| 0                    | 1.1145             | 0.0000*** | 1.9954                  | 0.0000*** | 2.9290                        | 0.0000*** | 5.4420               | 0.0000*** |

\* $p < 0.05$     \*\* $p < 0.01$     \*\*\* $p < 0.001$

**TABLE C: Impact of intra-downturn GDP changes on health outcomes**

The effect of GDP/capita growth-rate changes on health metrics, *only* during those years when GDP/capita changes are negative. We control for population size, population structure (proportion of population below 15 years of age, proportion of population above 65 years of age) and for inter-country differences in healthcare infrastructure in addition to political, cultural and structural differences (by introducing dummy variables for all of the countries in the dataset).

|                                      | <b>Coefficient</b> | <b>RSE</b> | <b>P-value</b> | <b>Lower 95% CI</b> | <b>Upper 95% CI</b> |
|--------------------------------------|--------------------|------------|----------------|---------------------|---------------------|
| <b>Neonatal mortality</b>            | -0.0472            | (0.02120)  | 0.0261*        | -0.0888             | -0.0056             |
| <b>Post-neonatal mortality</b>       | -0.0575            | (0.03487)  | 0.0993         | -0.1259             | 0.0109              |
| <b>One-to-five (child) mortality</b> | -0.1130            | (0.05576)  | 0.0428*        | -0.2224             | -0.0037             |
| <b>Under-five mortality</b>          | -0.1990            | (0.09490)  | 0.0362*        | -0.3852             | -0.0128             |

\*  $p < 0.05$     \*\*  $p < 0.01$     \*\*\*  $p < 0.001$

**TABLE D: Influence of downturn length**

The effect of all downturn years, except the first one, of a multi-year downturn, compared to the first year of all economic downturns. We control for population size, population structure (proportion of population below 15 years of age, proportion of population above 65 years of age) and for inter-country differences in healthcare infrastructure in addition to political, cultural and structural differences (by introducing dummy variables for all of the countries in the dataset).

|                                      | <b>Coefficient</b> | <b>RSE</b> | <b>P-value</b> | <b>Lower 95% CI</b> | <b>Upper 95% CI</b> |
|--------------------------------------|--------------------|------------|----------------|---------------------|---------------------|
| <b>Neonatal mortality</b>            | 0.9774             | (0.17251)  | 0.0000***      | 0.6392              | 1.3155              |
| <b>Post-neonatal mortality</b>       | 1.9665             | (0.25940)  | 0.0000***      | 1.4580              | 2.4751              |
| <b>One-to-five (child) mortality</b> | 2.8784             | (0.44139)  | 0.0000***      | 2.0131              | 3.7438              |
| <b>Under-five mortality</b>          | 5.2273             | (0.75545)  | 0.0000***      | 3.7462              | 6.7083              |

\*  $p < 0.05$     \*\*  $p < 0.01$     \*\*\*  $p < 0.001$

**TABLE E: Stratification of countries into quartiles by GDP per capita:**

The effect of GDP/capita growth-rate changes on four child-health outcomes. The data has been quartiled, depending on the country's average GDP per capita from 1981-2011. We control for population size, population structure (proportion of population below 15 years of age, proportion of population above 65 years of age) and for inter-country differences in healthcare infrastructure in addition to political, cultural and structural differences (by introducing dummy variables for all of the countries in the dataset).

*First quartile – richest countries:*

|                                      | <b>Coefficient</b> | <b>RSE</b> | <b>P-value</b> | <b>Lower 95% CI</b> | <b>Upper 95% CI</b> | <b>Beta coefficient</b> |
|--------------------------------------|--------------------|------------|----------------|---------------------|---------------------|-------------------------|
| <b>Neonatal mortality</b>            | -0.0697            | 0.0195     | 0.0004***      | -0.108              | -0.0314             | -0.0698                 |
| <b>Post-neonatal mortality</b>       | -0.0669            | 0.0177     | 0.0002***      | -0.1016             | -0.0321             | -0.1093                 |
| <b>One-to-five (child) mortality</b> | -0.0372            | 0.0107     | 0.0005***      | -0.0583             | -0.0162             | -0.1309                 |
| <b>Under-five mortality</b>          | -0.1700            | 0.0452     | 0.0002***      | -0.2586             | -0.0813             | -0.0924                 |

*Fourth quartile – poorest countries:*

|                                      | <b>Coefficient</b> | <b>RSE</b> | <b>P-value</b> | <b>Lower 95% CI</b> | <b>Upper 95% CI</b> | <b>Beta Coefficient</b> |
|--------------------------------------|--------------------|------------|----------------|---------------------|---------------------|-------------------------|
| <b>Neonatal mortality</b>            | -0.1156            | 0.0320     | 0.0003***      | -0.1783             | -0.0529             | -0.0618                 |
| <b>Post-neonatal mortality</b>       | -0.2250            | 0.0558     | 0.0001***      | -0.3345             | -0.1156             | -0.0797                 |
| <b>One-to-five (child) mortality</b> | -0.3422            | 0.0857     | 0.0001***      | -0.5102             | -0.1741             | -0.0609                 |
| <b>Under-five mortality</b>          | -0.5974            | 0.1510     | 0.0001***      | -0.8936             | -0.3012             | -0.0696                 |

\*  $p < 0.05$     \*\*  $p < 0.01$     \*\*\*  $p < 0.001$

**TABLE F: Impact of economic downturns, using three measures of GDP/capita, on health outcomes**

We use three different measures of the annual rate of change in GDP per capita to form three different measures of economic downturns and then we assess the effect of these three variables on four child-health outcomes. We control for population size, population structure (proportion of population below 15 years of age, proportion of population above 65 years of age) and for inter-country differences in healthcare infrastructure in addition to political, cultural and structural differences (by introducing dummy variables for all of the countries in the dataset).

|                                      | <b>GDP per capita (constant local currency units)</b> |                | <b>GDP per capita (constant 2005 international dollars)</b> |                | <b>GDP per capita (current international dollars).</b> |                |
|--------------------------------------|-------------------------------------------------------|----------------|-------------------------------------------------------------|----------------|--------------------------------------------------------|----------------|
|                                      | <b>Coefficient</b>                                    | <b>P-value</b> | <b>Coefficient</b>                                          | <b>P-value</b> | <b>Coefficient</b>                                     | <b>P-value</b> |
| <b>Neonatal mortality</b>            | 1.1145                                                | 0.0000***      | 1.1162                                                      | 0.0000***      | 0.8230                                                 | 0.0000***      |
| <b>Post-neonatal mortality</b>       | 1.9954                                                | 0.0000***      | 2.0105                                                      | 0.0000***      | 1.6676                                                 | 0.0000***      |
| <b>One-to-five (child) mortality</b> | 2.9290                                                | 0.0000***      | 2.9598                                                      | 0.0000***      | 2.1478                                                 | 0.0000***      |
| <b>Under-five mortality</b>          | 5.4420                                                | 0.0000***      | 5.4812                                                      | 0.0000***      | 4.1812                                                 | 0.0000***      |

\*  $p < 0.05$     \*\*  $p < 0.01$     \*\*\*  $p < 0.001$

**TABLE G: Impact of GDP/capita changes, using three measures of GDP, on health outcomes**

We use three different measures of the annual rate of change in GDP per capita on four child-health outcomes. We control for population size, population structure (proportion of population below 15 years of age, proportion of population above 65 years of age) and for inter-country differences in healthcare infrastructure in addition to political, cultural and structural differences (by introducing dummy variables for all of the countries in the dataset).

|                                      | GDP per capita (constant local currency units) |           | GDP per capita (constant 2005 international dollars) |           | GDP per capita (current international dollars). |           |
|--------------------------------------|------------------------------------------------|-----------|------------------------------------------------------|-----------|-------------------------------------------------|-----------|
|                                      | Coefficient                                    | P-value   | Coefficient                                          | P-value   | Coefficient                                     | P-value   |
| <b>Neonatal mortality</b>            | -0.0681                                        | 0.0000*** | -0.0668                                              | 0.0000*** | -0.0208                                         | 0.0344*   |
| <b>Post-neonatal mortality</b>       | -0.1364                                        | 0.0000*** | -0.1352                                              | 0.0000*** | -0.0709                                         | 0.0000*** |
| <b>One-to-five (child) mortality</b> | -0.1641                                        | 0.0000*** | -0.1616                                              | 0.0000*** | -0.0597                                         | 0.0118*   |
| <b>Under-five mortality</b>          | -0.3315                                        | 0.0000*** | -0.3265                                              | 0.0000*** | -0.1353                                         | 0.0015**  |

\*  $p < 0.05$     \*\*  $p < 0.01$     \*\*\*  $p < 0.001$



**TABLE H: Impact of economic downturns on health outcomes using additional controls in multivariate regression**

The effect of economic downturns on four child-health outcomes. We control for population size, population structure (proportion of population below 15 years of age, proportion of population above 65 years of age) and for inter-country differences in healthcare infrastructure in addition to political, cultural and structural differences (by introducing dummy variables for all of the countries in the dataset). We also control for additional economic (private capital inflows), demographic (percentage of the population living in urban areas), infrastructure-related (water accessibility) and war-associated (armed personnel as a percentage of labor force) factors.

|                                      | <b>Coefficient</b> | <b>RSE</b> | <b>P-value</b> | <b>Lower 95% CI</b> | <b>Upper 95% CI</b> |
|--------------------------------------|--------------------|------------|----------------|---------------------|---------------------|
| <b>Neonatal mortality</b>            | 0.2745             | (0.08836)  | 0.0019**       | 0.1012              | 0.4478              |
| <b>Post-neonatal mortality</b>       | 0.5736             | (0.15301)  | 0.0002***      | 0.2735              | 0.8736              |
| <b>One-to-five (child) mortality</b> | 0.7652             | (0.25281)  | 0.0025**       | 0.2694              | 1.2610              |
| <b>Under-five mortality</b>          | 1.4652             | (0.41942)  | 0.0005***      | 0.6427              | 2.2877              |

\*  $p < 0.05$     \*\*  $p < 0.01$     \*\*\*  $p < 0.001$

**TABLE I: Impact of GDP/capita on health outcomes using additional controls in multivariate regression analysis**

The impact of GDP/capita growth-rate changes on four child-health metrics. We control for population size, population structure (proportion of population below 15 years of age, proportion of population above 65 years of age) and for inter-country differences in healthcare infrastructure in addition to political, cultural and structural differences (by introducing dummy variables for all of the countries in the dataset). We also control for additional economic (private capital inflows), demographic (percentage of the population living in urban areas), infrastructure-related (water accessibility) and war-associated (armed personnel as a percentage of labor force) factors.

|                                      | <b>Coefficient</b> | <b>RSE</b> | <b>P-value</b> | <b>Lower 95% CI</b> | <b>Upper 95% CI</b> |
|--------------------------------------|--------------------|------------|----------------|---------------------|---------------------|
| <b>Neonatal mortality</b>            | -0.0102            | (0.0083)   | 0.2220         | -0.0265             | 0.0062              |
| <b>Post-neonatal mortality</b>       | -0.0391            | (0.0162)   | 0.0158*        | -0.0709             | -0.0074             |
| <b>One-to-five (child) mortality</b> | -0.0171            | (0.0237)   | 0.4691         | -0.0635             | 0.0293              |
| <b>Under-five mortality</b>          | -0.0619            | (0.0407)   | 0.1280         | -0.1416             | 0.0178              |

\*  $p < 0.05$     \*\*  $p < 0.01$     \*\*\*  $p < 0.001$

**TABLE J: Impact of economic downturns on health outcomes including inflation as a control**

The impact of economic downturns on four child-health metrics. We control for population size, population structure (proportion of population below 15 years of age, proportion of population above 65 years of age) and for inter-country differences in healthcare infrastructure in addition to political, cultural and structural differences (by introducing dummy variables for all of the countries in the dataset). We also control for inflation.

|                                      | <b>Coefficient</b> | <b>RSE</b> | <b>P-value</b> | <b>Lower 95% CI</b> | <b>Upper 95% CI</b> |
|--------------------------------------|--------------------|------------|----------------|---------------------|---------------------|
| <b>Neonatal mortality</b>            | 0.9859             | (0.13319)  | 0.0000***      | 0.7248              | 1.2470              |
| <b>Post-neonatal mortality</b>       | 1.5615             | (0.19144)  | 0.0000***      | 1.1862              | 1.9368              |
| <b>One-to-five (child) mortality</b> | 2.6572             | (0.36284)  | 0.0000***      | 1.9459              | 3.3686              |
| <b>Under-five mortality</b>          | 4.7308             | (0.59547)  | 0.0000***      | 3.5633              | 5.8982              |

\*  $p < 0.05$     \*\*  $p < 0.01$     \*\*\*  $p < 0.001$

**TABLE K: Impact of GDP/capita changes on health outcomes including inflation as a control**

The impact of changes in the growth rate of GDP/capita on four child-health metrics. We control for population size, population structure (proportion of population below 15 years of age, proportion of population above 65 years of age) and for inter-country differences in healthcare infrastructure in addition to political, cultural and structural differences (by introducing dummy variables for all of the countries in the dataset). We also control for inflation.

|                                      | <b>Coefficient</b> | <b>RSE</b> | <b>P-value</b> | <b>Lower 95% CI</b> | <b>Upper 95% CI</b> |
|--------------------------------------|--------------------|------------|----------------|---------------------|---------------------|
| <b>Neonatal mortality</b>            | -0.0701            | (0.01203)  | 0.0000***      | -0.0937             | -0.0465             |
| <b>Post-neonatal mortality</b>       | -0.1249            | (0.01792)  | 0.0000***      | -0.1600             | -0.0897             |
| <b>One-to-five (child) mortality</b> | -0.1900            | (0.03139)  | 0.0000***      | -0.2515             | -0.1284             |
| <b>Under-five mortality</b>          | -0.3504            | (0.05295)  | 0.0000***      | -0.4543             | -0.2466             |

\*  $p < 0.05$     \*\*  $p < 0.01$     \*\*\*  $p < 0.001$

**TABLE L: Impact of economic downturns and GDP/capita on health outcomes using WHO surveillance robustness check**

The impact of changes in the growth rate of GDP/capita and economic downturns on four child-health metrics. We control for population size, population structure (proportion of population below 15 years of age, proportion of population above 65 years of age) and for inter-country differences in healthcare infrastructure in addition to political, cultural and structural differences (by introducing dummy variables for all of the countries in the dataset). We account for the WHO surveillance check. To account for variations in surveillance strength and data recording between countries, and the possibility that data quality from poorer nations may be less robust, we restricted our analysis to ‘Level 1’ and ‘Level 2’ quality data sources as defined by the WHO.

|                                      | Recession dummy |           | GDP/capita  |           |
|--------------------------------------|-----------------|-----------|-------------|-----------|
|                                      | Coefficient     | P-value   | Coefficient | P-value   |
| <b>Neonatal mortality</b>            | 0.3774          | 0.0005*** | -0.0264     | 0.0004*** |
| <b>Post-neonatal mortality</b>       | 0.9243          | 0.0000*** | -0.0836     | 0.0000*** |
| <b>One-to-five (child) mortality</b> | 0.4804          | 0.0002*** | -0.0298     | 0.0005*** |
| <b>Under-five mortality</b>          | 1.7057          | 0.0000*** | -0.1334     | 0.0000*** |

\*  $p < 0.05$     \*\*  $p < 0.01$     \*\*\*  $p < 0.001$

**TABLE M: Impact of economic downturns on health outcomes using World Bank mortality data**

The impact of economic downturns on three child-health metrics. Instead of using mortality data from the IHME, we use data from the World Bank. We control for population size, population structure (proportion of population below 15 years of age, proportion of population above 65 years of age) and for inter-country differences in healthcare infrastructure in addition to political, cultural and structural differences (by introducing dummy variables for all of the countries in the dataset).

|                             | <b>Coefficient</b> | <b>RSE</b> | <b>P-value</b> | <b>Lower 95% CI</b> | <b>Upper 95% CI</b> |
|-----------------------------|--------------------|------------|----------------|---------------------|---------------------|
| <b>Neonatal mortality</b>   | 0.5714             | (0.08567)  | 0.0000***      | 0.4034              | 0.7393              |
| <b>Infant mortality</b>     | 3.2529             | (0.33241)  | 0.0000***      | 2.6012              | 3.9045              |
| <b>Under-five mortality</b> | 5.7984             | (0.61998)  | 0.0000***      | 4.5829              | 7.0138              |

**TABLE N: Impact of economic downturns on health outcomes using World Bank mortality data (with WHO surveillance check)**

The impact of economic downturns on three child-health metrics. Instead of using mortality data from the IHME we use data from the World Bank. We control for population size, population structure (proportion of population below 15 years of age, proportion of population above 65 years of age) and for inter-country differences in healthcare infrastructure in addition to political, cultural and structural differences (by introducing dummy variables for all of the countries in the dataset). To account for variations in surveillance strength and data recording between countries, and the possibility that data quality from poorer nations may be less robust, we restricted our analysis to ‘Level 1’ and ‘Level 2’ quality data sources as defined by the WHO.

|                             | <b>Coefficient</b> | <b>RSE</b> | <b>P-value</b> | <b>Lower 95% CI</b> | <b>Upper 95% CI</b> |
|-----------------------------|--------------------|------------|----------------|---------------------|---------------------|
| <b>Neonatal mortality</b>   | 0.3276             | (0.08041)  | 0.0000***      | 0.1699              | 0.4853              |
| <b>Infant mortality</b>     | 1.0687             | (0.27314)  | 0.0001***      | 0.5331              | 1.6043              |
| <b>Under-five mortality</b> | 1.4938             | (0.40550)  | 0.0002***      | 0.6986              | 2.2889              |

**TABLE O: Indicator definitions**

| <b>Child health outcome analysed</b>       | <b>Definition</b>                                 | <b>Years that data are available</b> | <b>Source</b> |
|--------------------------------------------|---------------------------------------------------|--------------------------------------|---------------|
| <b>Neonatal mortality</b>                  | Deaths per 1,000 live births (age 1 to 28 days)   | 1980-2010                            | IHME          |
| <b>Post-neonatal mortality</b>             | Deaths per 1,000 (age 29 to 364 days)             | 1980-2010                            | IHME          |
| <b>One-to-five years (child) mortality</b> | Deaths per 1,000 (age 1 to 5 years)               | 1980-2010                            | IHME          |
| <b>Under-five mortality</b>                | Deaths per 1,000 live births (under the age of 5) | 1980-2010                            | IHME          |

**IHME:** Institute for Health Metrics and Evaluation, Infant and Child Mortality Estimates by Country 1980-2010

**Source:** <http://ghdx.healthmetricsandevaluation.org/record/infant-and-child-mortality-estimates-country-1970-2010>
